# Supplementary material
Source: publisher site journal article supplement (https://www.dovepress.com/article/327285)
Supplement: Supplementary file 1 [file get_supplementary_file.php]

Supplement Table 1: The predictive value of pulmonary function parameter

|           | AUC   | p      | Upper | Lower | Cutoff<br>value | sen    | spe    |
|-----------|-------|--------|-------|-------|-----------------|--------|--------|
| FEV1/FVC% | 0.736 | <0.001 | 0.640 | 0.832 | 68.25           | 76.70% | 64.70% |
| FEV1%     | 0.694 | 0.001  | 0.592 | 0.796 | 77.15           | 47.80% | 85.30% |
| PEF%      | 0.660 | 0.006  | 0.550 | 0.771 | 56.80           | 92.20% | 38.20% |
| MVV%      | 0.617 | 0.046  | 0.502 | 0.731 | 94.40           | 63.30% | 58.80% |
| ppo-FEV1% | 0.684 | 0.002  | 0.584 | 0.784 | 61.65           | 45.60% | 91.20% |
| ppo-DLCO% | 0.606 | 0.070  | 0.491 | 0.721 | 47.05           | 85.60% | 35.30% |

FEV1: Forced Expiratory Volume in the first second; FVC: forced vital capacity; DLCO: carbon monoxide diffusing capacity; PEF: peak expiratory flow; MVV: maximal ventilatory volumn; AUC: area under the cruve; ppo: post-pulmonary operation; sen: sensitivity; spe: specificity.
